# Supplementary material for: Pore size control and organocatalytic properties of nanostructured silica hybrid materials containing amino and ammonium groups
Source: Royal Society of Chemistry journal article supplement (doi:10.1039/c1jm10422e), 2011-01-01
Supplement: c1jm10422e.pdf [file c1jm10422e.pdf]

## Electronic Supplementary Information

Pore size control and organocatalytic properties of  
nanostructured silica hybrid materials containing amino and  
ammonium groups

*Samir El Hankari, Blanca Motos-Pérez, Peter Hesemann,\* Ahmed Bouhaouss and Joël J.E.  
Moreau*

*Institut Charles Gerhardt de Montpellier,  
8 rue de l'Ecole Normale, 34296 Montpellier cedex 05, France  
e-mail: peter.hesemann@enscm.fr  
phone: +33-(0)4.67.14.72.17  
fax: +33-(0)4.67.14.43.53*

## Summary

|                                                                                                                                                                   |   |
|-------------------------------------------------------------------------------------------------------------------------------------------------------------------|---|
| <b>Photos1-6:</b> SEM-image of materials <b>A16A18</b> , <b>1/5</b> and <b>1/10</b>                                                                               | 3 |
| <b>Figure 1:</b> Nitrogen adsorption-desorption isotherms of materials <b>A12</b> , <b>A14</b> , <b>1/5</b> , <b>1/20</b> and <b>1/40</b> .                       | 4 |
| <b>Figure 2:</b> Pore-pore distance in the materials vs. molar mesitylene/precursor 1 ratio in the hydrolysis condensation mixture                                | 4 |
| <b>Figure 3:</b> $^{29}\text{Si}$ CP-MAS solid state NMR spectrum of material <b>A16A18</b> after 5 successive Henry reaction cycles                              | 5 |
| <b>Figure 4:</b> $^{13}\text{C}$ CP-MAS solid state NMR spectrum of material <b>A16A18</b> after 5 successive Henry reaction cycles                               | 5 |
| <b>Figure 5:</b> $^{29}\text{Si}$ CP-MAS solid state NMR spectrum of material <b>A16A18</b> after 4 successive ring opening reaction cycles                       | 6 |
| <b>Figure 6:</b> $^{13}\text{C}$ CP-MAS solid state NMR spectrum of material <b>A16A18</b> after 4 successive ring opening reaction cycles                        | 6 |
| <b>Figure 7:</b> $^{29}\text{Si}$ CP-MAS solid state NMR spectrum of material <b>A16A18-p</b> after 4 successive ring opening reaction cycles                     | 7 |
| <b>Figure 8:</b> $^{13}\text{C}$ CP-MAS solid state NMR spectrum of material <b>A16A18 -p</b> after 4 successive ring opening reaction cycles                     | 7 |
| <b>Figure 9:</b> X-ray diffractogram of material <b>A16A18</b> after 5 successive ring opening reaction cycles                                                    | 8 |
| <b>Figure 10:</b> X-ray diffractogram of material <b>A16A18-p</b> after 4 successive ring opening reaction cycles                                                 | 8 |
| <b>Table 1:</b> Elemental analysis of material <b>A16A18-p</b> before and after use in ring opening reaction                                                      | 8 |
| <b>Figure 11:</b> Nitrogen adsorption-desorption isotherms of material <b>A16A18-p</b> before and after four reaction cycles in ring opening reaction of glycidol | 9 |

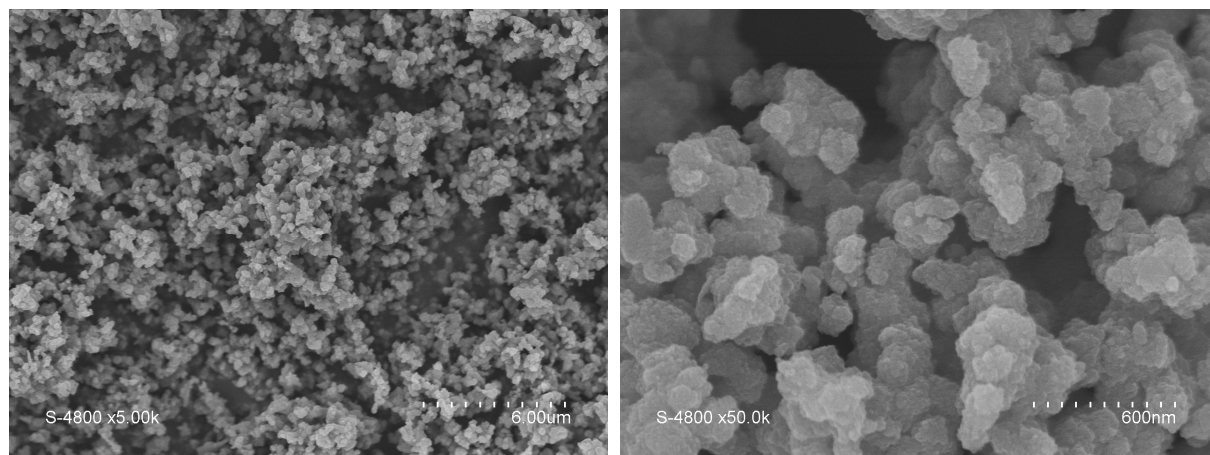

Material A16A18

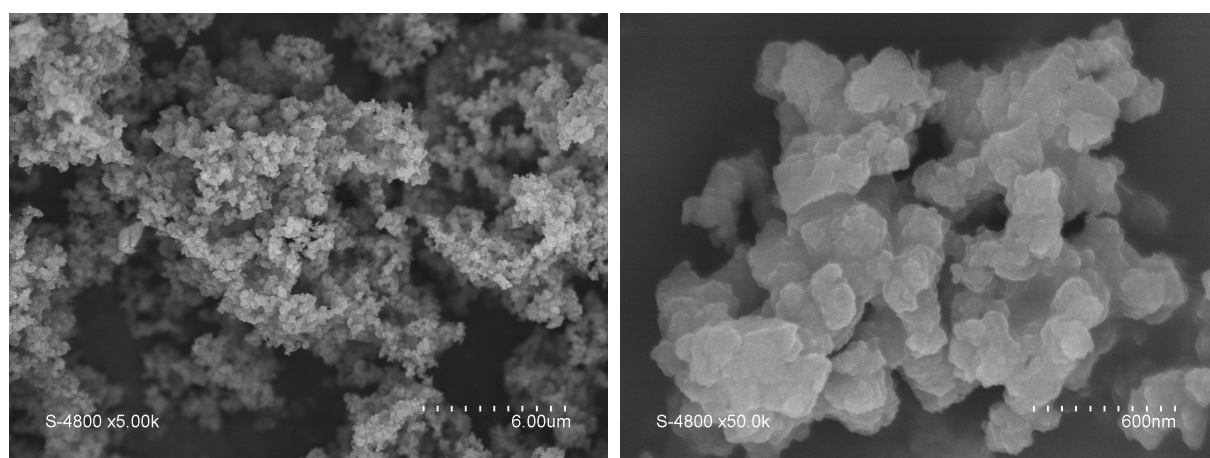

Material 1/5

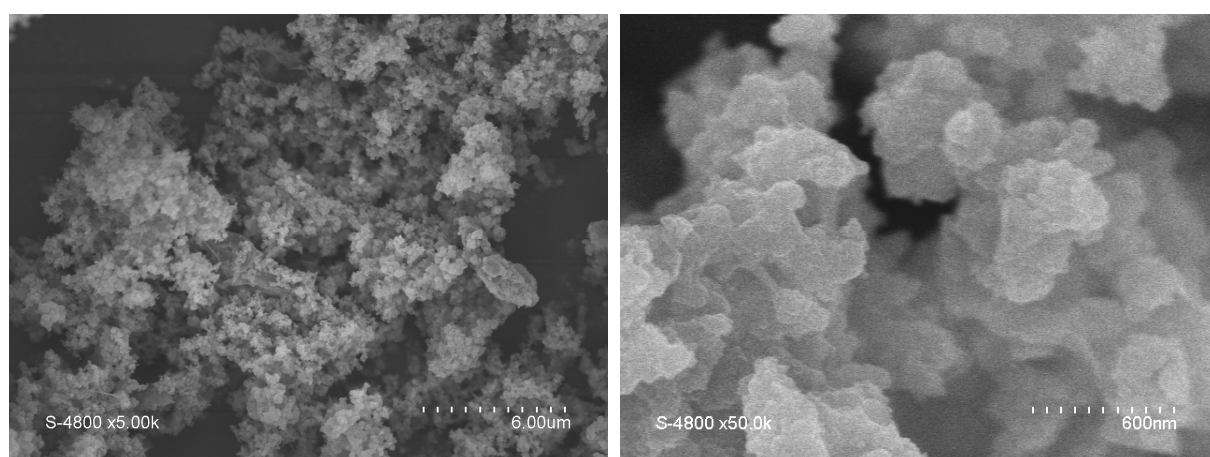

Material 1/10

**Photos1-6:** SEM-image of materials A16A18, 1/5 and 1/10

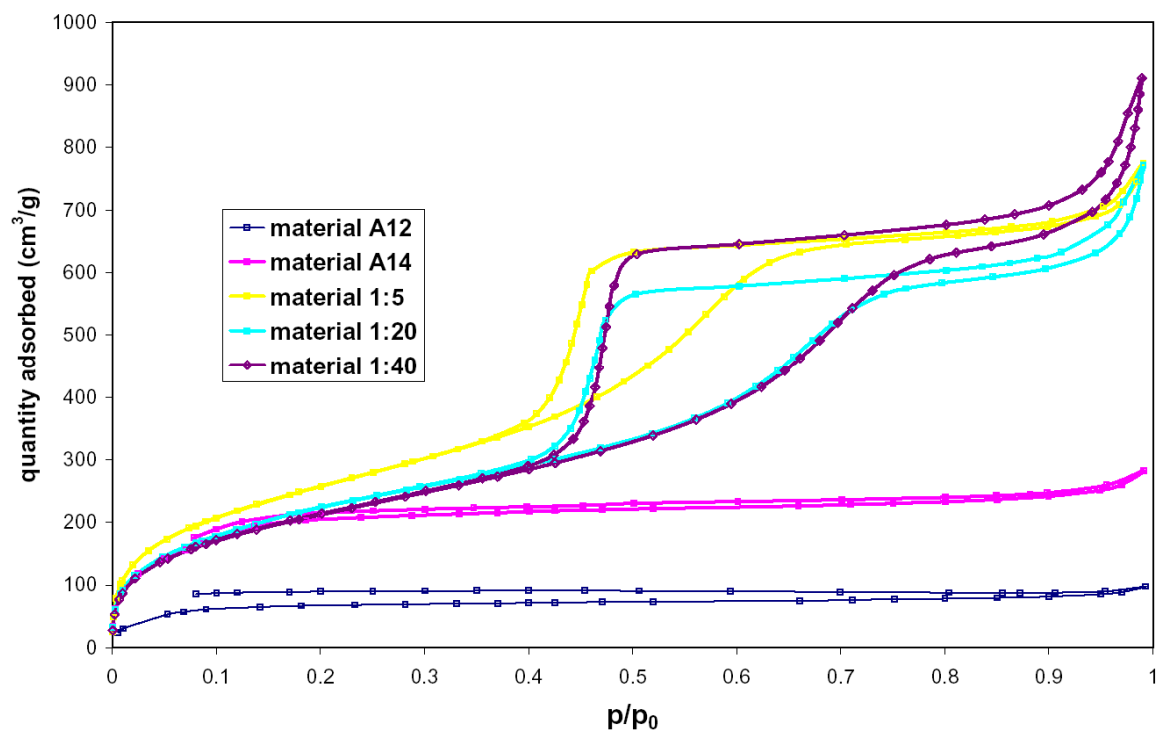

**Figure 1:** Nitrogen adsorption-desorption isotherms of materials A12, A14, 1/5, 1/20 and 1/40.

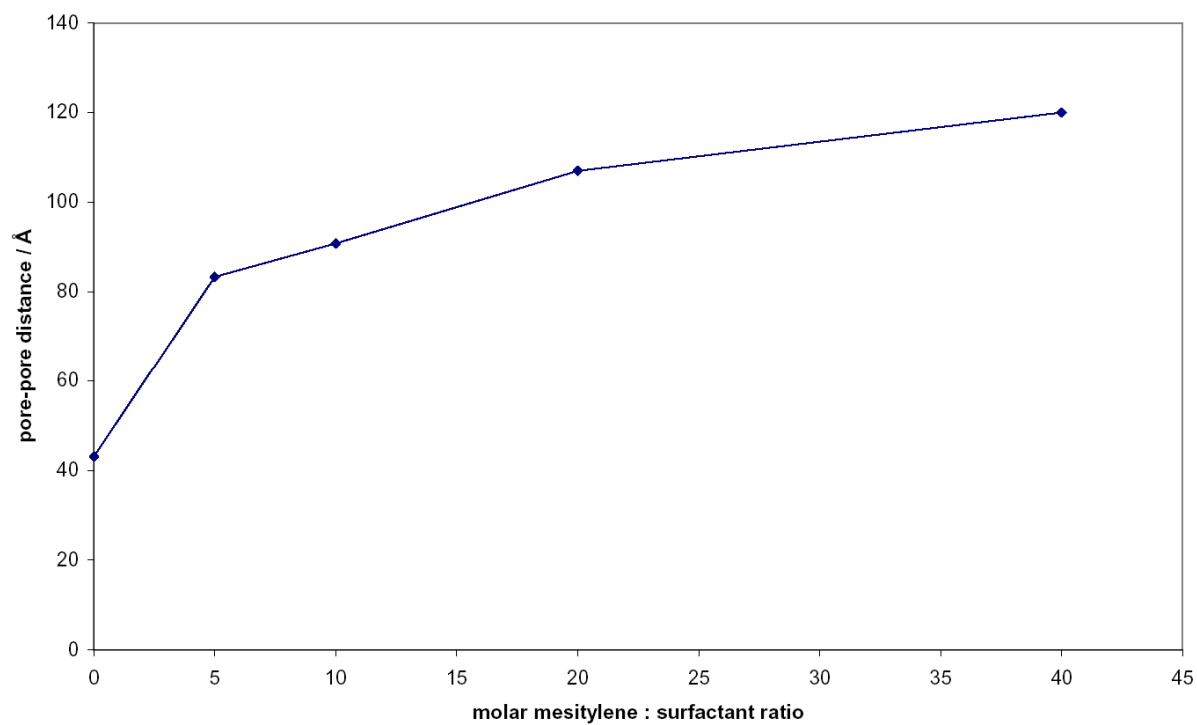

**Figure 2:** Pore-pore distance in the materials vs. molar mesitylene/precursor 1 ratio in the hydrolysis condensation mixture

### Solid state NMR spectra of the materials after use in Henry reactions

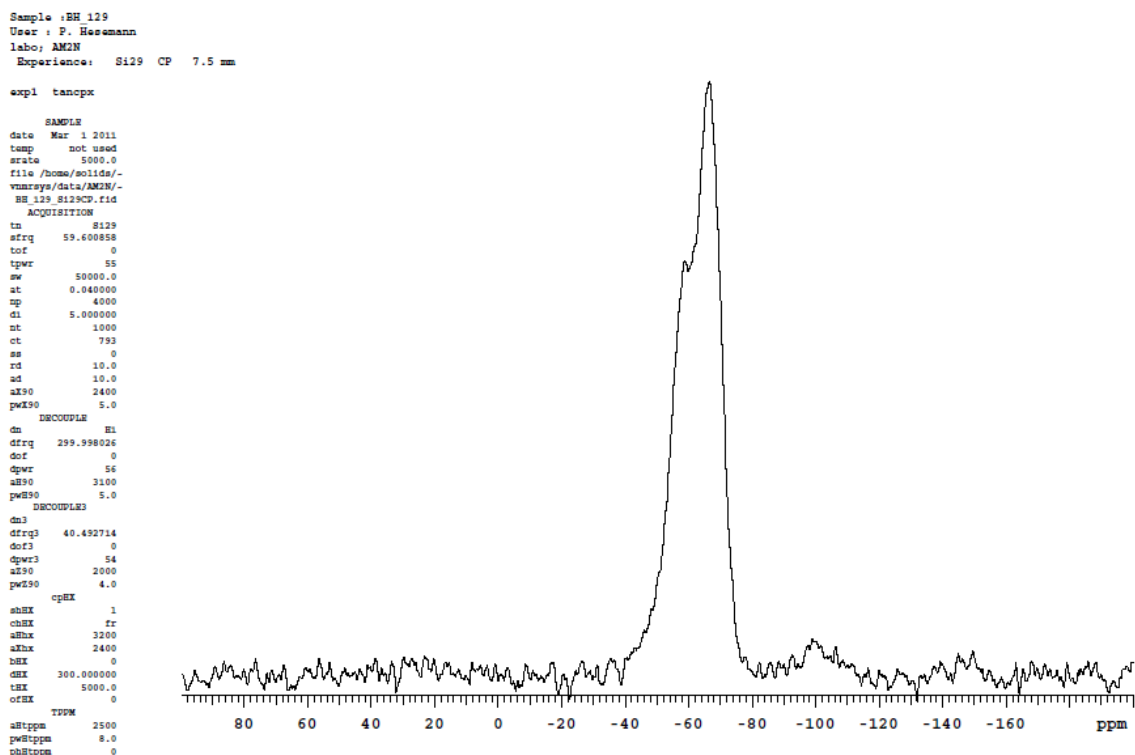

**Figure 3:**  $^{29}\text{Si}$  CP-MAS solid state NMR spectrum of material **A16A18** after 5 successive Henry reaction cycles

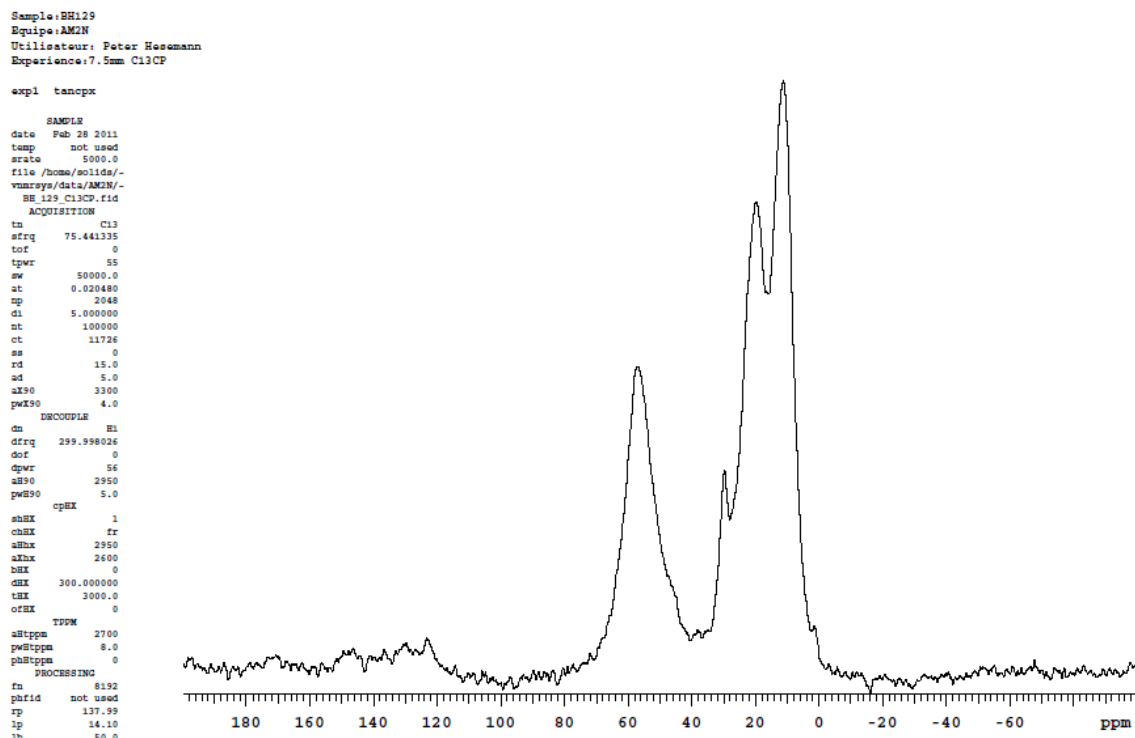

**Figure 4:**  $^{13}\text{C}$  CP-MAS solid state NMR spectrum of material **A16A18** after 5 successive Henry reaction cycles

### Solid state NMR spectra of the materials after use in ring opening reaction of glycidol with lauric acid

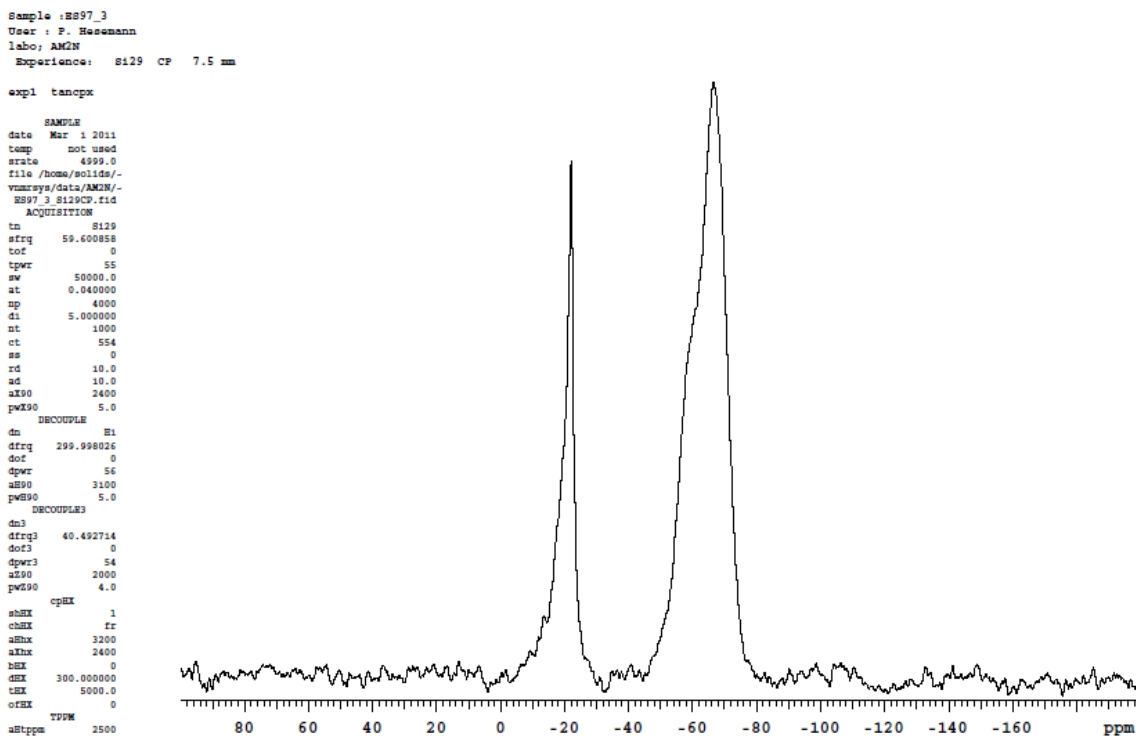

**Figure 5:**  $^{29}\text{Si}$  CP-MAS solid state NMR spectrum of material **A16A18** after 5 successive ring opening reaction cycles.

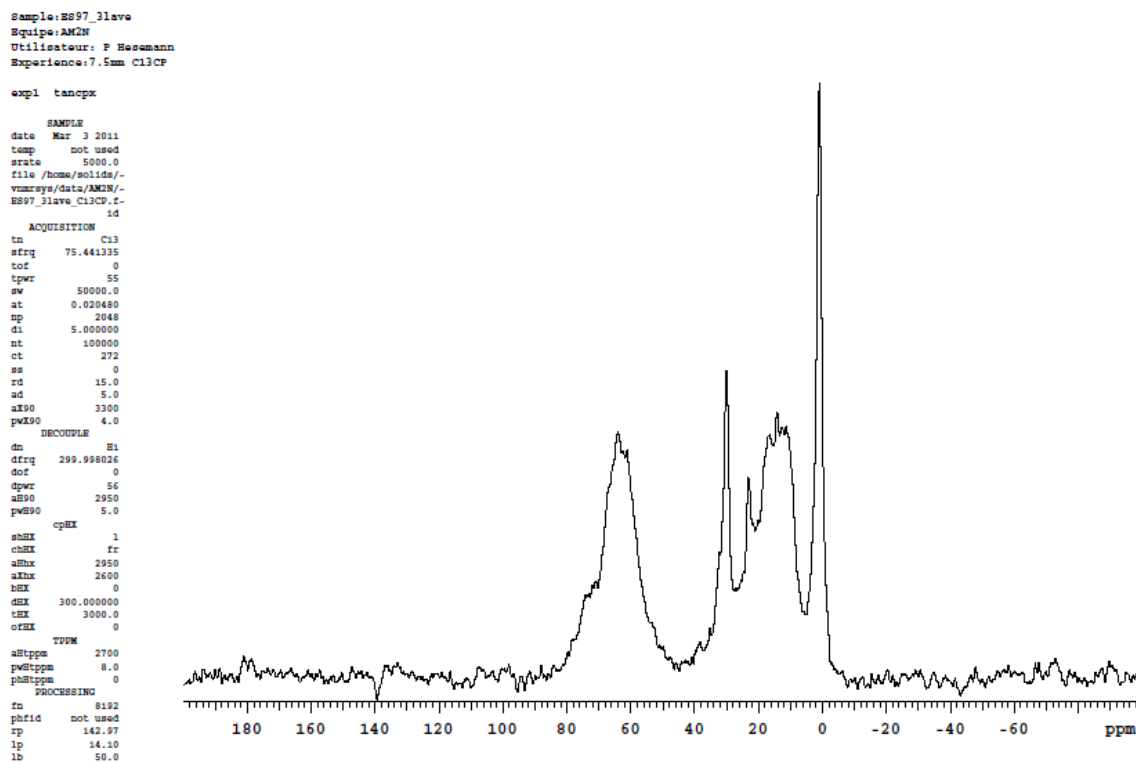

**Figure 6:**  $^{13}\text{C}$  CP-MAS solid state NMR spectrum of material **A16A18** after 5 successive ring opening reaction cycles

Sample : ES97\_4  
User : P. Hesemann  
labo: AM2N  
Experience: S129 CP 7.5 mm

exp1 tancpx

SAMPLE

date Mar 1 2011

temp not used

erate 5000.0

file /home/solids/-

vmrays/data/AM2N/-

ES97\_4\_s129cp.fid

ACQUISITION

tn s129

efrq 59.600858

tof 0

tpwr 55

aw 50000.0

at 0.040000

np 4000

d1 5.000000

nt 1000

ct 1000

ss 0

rd 10.0

ad 10.0

aX90 2400

pwX90 5.0

DECOUPLE

dn H1

dfrq 299.998026

dof 0

dpwr 56

aH90 3100

pwH90 5.0

DECOUPLE3

dn3

dfrq3 40.492714

dof3 0

dpwr3 54

aX90 2000

pwX90 4.0

CPHX

shhx 1

chhx fr

aHhx 3200

aXhx 2400

bxhx 0

dhx 300.000000

thx 5000.0

ofhx 0

TPPM

aHtppm 2500

pwHtppm 8.0

phHtppm 0

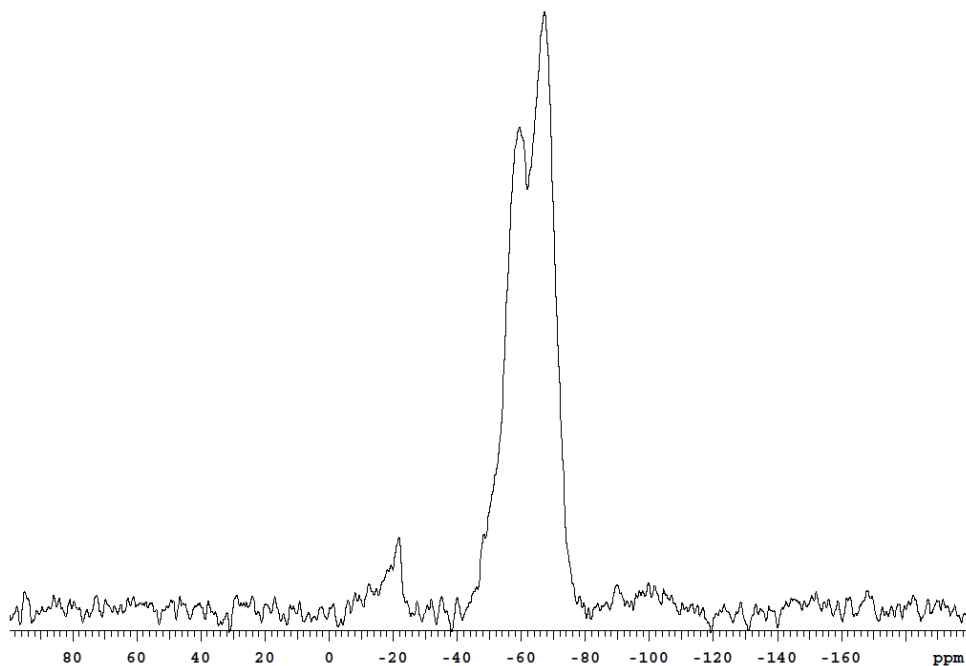

**Figure 7:**  $^{29}\text{Si}$  CP-MAS solid state NMR spectrum of material **A16A18-p** after 5 successive ring opening reaction cycles

Sample: ES97\_4lave  
Equipe: AM2N  
Utilisateur: P Hesemann  
Experience: 7.5mm C13CP

exp1 tancpx

SAMPLE

date Mar 3 2011

temp not used

erate 5000.0

file /home/solids/-

vmrays/data/AM2N/-

ES97\_4lave\_c13cp.f-

id

ACQUISITION

tn C13

efrq 75.441335

tof 0

tpwr 55

aw 50000.0

at 0.020480

np 2048

d1 5.000000

nt 100000

ct 1000

ss 0

rd 15.0

ad 5.0

aX90 3300

pwX90 4.0

DECOUPLE

dn H1

dfrq 299.998026

dof 0

dpwr 56

aH90 2950

pwH90 5.0

CPHX

shhx 1

chhx fr

aHhx 2950

aXhx 2600

bxhx 0

dhx 300.000000

thx 3000.0

ofhx 0

TPPM

aHtppm 2700

pwHtppm 8.0

phHtppm 0

PROCESSING

fn 8192

phfid not used

rp 142.97

lp 14.10

lb 50.0

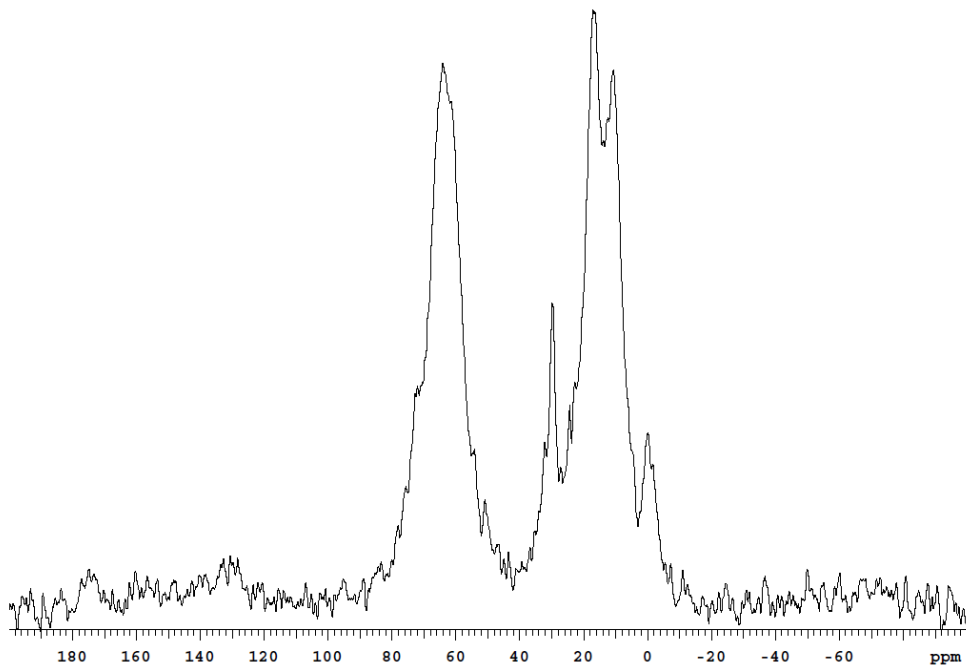

**Figure 8:**  $^{13}\text{C}$  CP-MAS solid state NMR spectrum of material **A16A18-p** after 5 successive ring opening reaction cycles

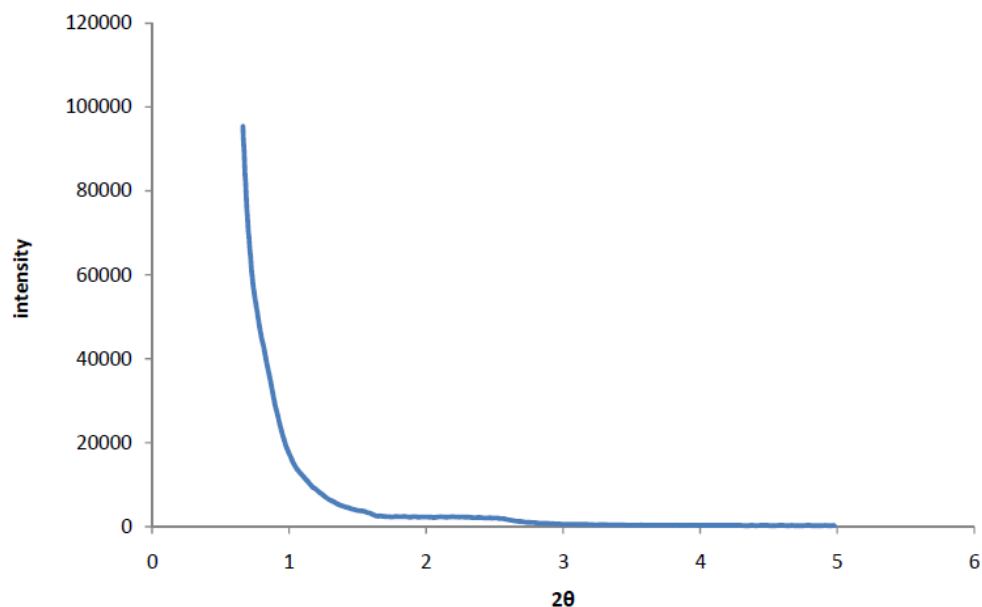

**Figure 9:** X-ray diffractogram of material **A16A18** after 5 successive ring opening reaction cycles

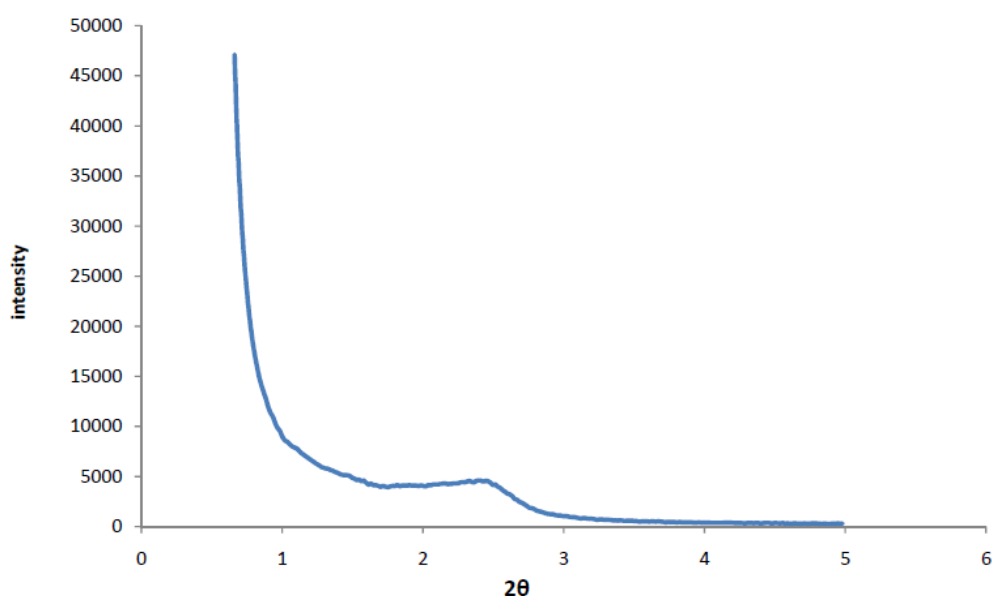

**Figure 10:** X-ray diffractogram of material **A16A18-p** after 5 successive ring opening reaction cycles

**Table 1:** Elemental analysis of material **A16A18-p** before and after use in ring opening reaction

|                           | C     | H     | N    |
|---------------------------|-------|-------|------|
| A16A18-p before catalysis | 31.06 | 6.48  | 3.81 |
| A16A18-p after catalysis  | 36.26 | 10.49 | 2.01 |



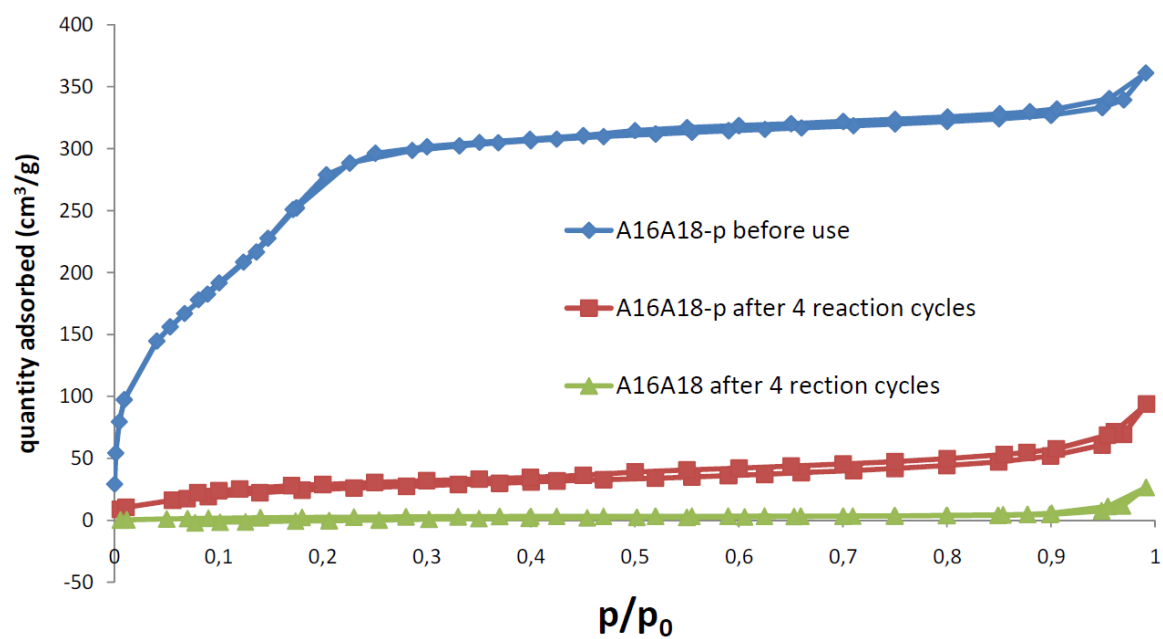

**Figure 11:** Nitrogen adsorption-desorption isotherms of material **A16A18-p** before and after four reaction cycles in ring opening reaction of glycidol
